# Supplementary material for: UP-DOWN cortical dynamics reflect state transitions in a bistable network
Source: eLife journal article supplement (doi:10.7554/elife.22425), 2017-08-04
Supplement: supp [file elife_poa_e22425_Transparent_Reporting_File.docx]

***eLife’s* transparent reporting form**

We encourage authors to provide detailed information *within their submission* to facilitate the interpretation and replication of experiments. If you have any questions, please contact us: [editorial@elifesciences.org](mailto:editorial@elifesciences.org).

**Sample-size estimation**

- You should state whether an appropriate sample size was computed when the study was being designed
- You should state the statistical method of sample size computation and any required assumptions
- If no explicit power analysis was used, you should describe how you decided what sample (replicate) size (number) to use

Please outline where this information can be found within the submission (e.g., page numbers or figure legends), or explain why this information doesn’t apply to your submission:

This is previously acquired data and we did not have control over sample size.

**Replicates**

- You should report how often each experiment was performed
- You should include a definition of biological versus technical replication
- The data obtained should be provided and sufficient information should be provided to indicate the number of independent biological and/or technical replicates
- If you encountered any outliers, you should describe how these were handled
- Criteria for exclusion/inclusion of data should be clearly stated
- High-throughput sequence data should be uploaded before submission, with a private link for reviewers provided (these are available from both GEO and ArrayExpress)

Please outline where this information can be found within the submission (e.g., page numbers or figure legends), or explain why this information doesn’t apply to your submission:

N=7; No experiments were excluded. All neurons recorded were included in the performed analyses.

**Statistical reporting**

- Statistical analysis methods should be described and justified
- Raw data should be presented in figures whenever informative to do so (typically when N per group is less than 10)
- For each experiment, you should identify the statistical tests used, exact values of N, definitions of center, methods of multiple test correction, and dispersion and precision measures (e.g., mean, median, SD, SEM, confidence intervals; and, for the major substantive results, a measure of effect size (e.g., Pearson's r, Cohen's d)
- Report exact p-values wherever possible alongside the summary statistics and 95% confidence intervals. These should be reported for all key questions and not only when the p-value is less than 0.05.

Below, a table summarizing the statistical tests used. Further details on statistical methods are described in sections "Statistics of UP&DOWN durations", "Spike count statistics", "Population firing statistics during Us and Ds" and "Instantaneous rates at onset and offset intervals" from the Methods Section (pages 23,24,25 and 26, respectively).

Please outline where this information can be found within the submission (e.g., page numbers or figure legends), or explain why this information doesn’t apply to your submission:

| Fig. Nr | Test | Page/line | N | p-value | f-value |
| --- | --- | --- | --- | --- | --- |
| 2D | Permutation | 6/147 | 7 | P<0.05 |  |
| - | Wilcoxon | 9/209 | 7 | P=1 |  |
| - | Wilcoxon | 9/212 | 7 | P=0.047 |  |
| 3E | Wilcoxon | 9/216 | 448 | P=0.12 |  |
| 3E | Wilcoxon | 9/218 | 448 | P=2x10-4 |  |
| 6D | ANOVA | 14/383 | - | P=0.013 | F(1,349=6.3 |
| - | Wilcoxon | 14/384 | 21 | P=0.0092 |  |

(For large datasets, or papers with a very large number of statistical tests, you may upload a single table file with tests, Ns, etc., with reference to page numbers in the manuscript.)

**Additional data files (“source data”)**

- We encourage you to upload relevant additional data files, such as numerical data that are represented as a graph in a figure, or as a summary table
- Where provided, these should be in the most useful format, and they can be uploaded as “Source data” files linked to a main figure or table
- Include model definition files including the full list of parameters used
- Include code used for data analysis (e.g., R, MatLab)
- Avoid stating that data files are “available upon request”

Please indicate the figures or tables for which source data files have been provided:
